# Supplementary material
Source: PubMed Central journal article supplement (PMC5098603)
Supplement: NIHMS68894-supplement-Supplementary_Information.pdf [file NIHMS68894-supplement-Supplementary_Information.pdf]

22 **S1: Scheme of the experimental geometry**

23 A schematic representation of the experimental geometry is shown in Fig. S1. The  
 24 *ac*-cut surface of a LBCO ( $x=9.5\%$ ) sample was illuminated with pump and probe  
 25 THz pulses, both polarized along the *c* direction (*i.e.*, perpendicular to the Cu-O  
 26 layers). The probe beam had an incidence angle of  $45^\circ$ , while the pump hit the  
 27 sample at normal incidence.

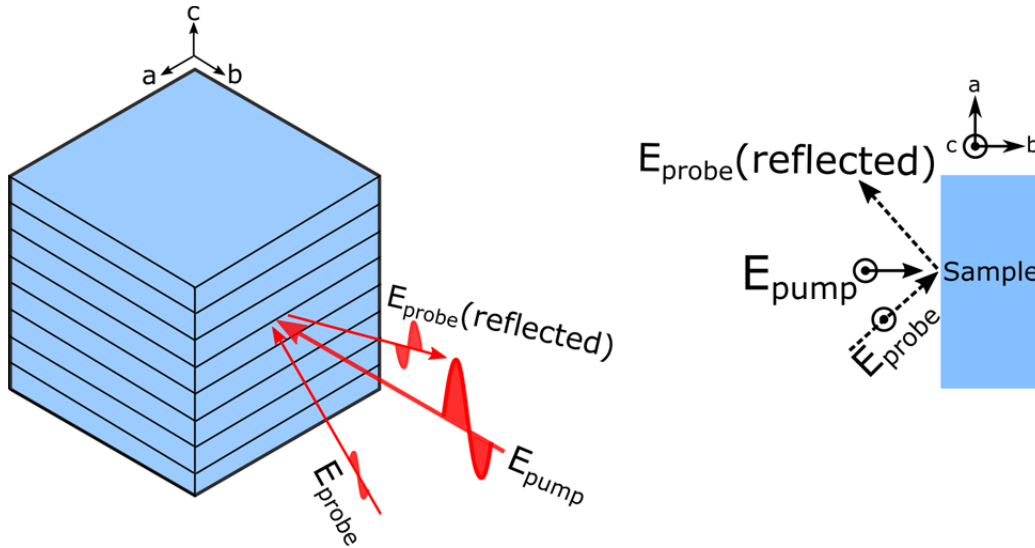

28

29 **Figure S1.** Schematic representation of the measurement geometry. The Cu-O planes are indicated along  
 30 with propagation vector and polarization of the light fields. A top view is shown on the right.

31

32 **S2. Josephson equation as Mathieu equation**

33 A Josephson junction can be approximated with an LC circuit equivalent. By

34 equating the capacitive current  $\left(I_c = C \frac{\partial V}{\partial t}\right)$  to the inductive tunneling current

35  $\left(-I_L = -I_0 \sin \theta_{i,i+1}(t)\right)$  and using then the second Josephson equation

36  $\left(\frac{\partial[\theta_{i,i+1}(t)]}{\partial t} = \frac{2eV}{\hbar}\right)$  we obtain the temporal dependence of the Josephson phase

37  $\left(\theta_{i,i+1}(t)\right)$  as

38 
$$-\frac{\epsilon_r}{c^2} \frac{\partial^2 \theta_{i,i+1}(x,t)}{\partial t^2} = \frac{\omega_p^2 \epsilon_r}{c^2} \sin \theta_{i,i+1}(x,t) \quad (1)$$

39 where  $\epsilon_r$  is the dielectric permittivity of the Josephson junction,  $c$  the speed of light,  
 40  $e$  the electronic charge,  $I_0$  the critical current,  $C$  the capacitance of the junction,  
 41 and

42 
$$\omega_p^2 = \omega_0^2 = \frac{2I_0 e}{\hbar C}.$$

43 The equation of motion of the Josephson phase with damping ( $\gamma$ ) therefore reads

44 
$$-\frac{1}{\gamma} \frac{\partial \theta_{i,i+1}(x,t)}{\partial t} - \frac{\epsilon_r}{c^2} \frac{\partial^2 \theta_{i,i+1}(x,t)}{\partial t^2} = \frac{\omega_p^2 \epsilon_r}{c^2} \sin \theta_{i,i+1}(x,t) \quad (2)$$

45 In a perturbed state in which the oscillator strength is modified as

46 
$$f(t) \sim \omega_p^2(t) \approx \omega_0^2 \left( 1 - \frac{\theta_0^2 + \theta_0^2 \cos(2\omega_0 t)}{4} \right) \quad (3)$$

47 the time dependence of the Josephson phase is described by

48 
$$\frac{\epsilon_r}{c^2} \frac{\partial^2 \theta_{probe}(x,t)}{\partial t^2} + \frac{1}{\gamma} \frac{\partial \theta_{probe}(x,t)}{\partial t} + \frac{\omega_0^2 \epsilon_r}{c^2} \left( 1 - \frac{\theta_0^2 + \theta_0^2 \cos(2\omega_0 t)}{4} \right) \theta_{probe}(x,t) = 0 \quad (4)$$

49 We note that Eq. (4) is a damped Mathieu equation of the form

50 
$$\frac{\partial^2 \theta_{probe}(x,t)}{\partial t^2} + \beta \frac{\partial \theta_{probe}(x,t)}{\partial t} + (a - \alpha \cos(2\omega_0(t))) \theta_{probe}(x,t) = 0 \quad (5)$$

51 where  $a = \left( 1 - \frac{\theta_0^2}{4} \right) \omega_0^2$ ,  $\alpha = \frac{\theta_0^2 \cos(2\omega_0 t)}{4} \omega_0^2$  and  $\beta = \frac{c^2}{\epsilon_r \gamma}$ .

52

### 53 **S3. Simulation of the nonlinear optical properties from the sine-Gordon equation**

54 A Josephson junction with semi-infinite layers stacked along the  $z$  direction (with  
 55 translational invariance along the  $y$  direction) can be modeled with the one-

56 dimensional sine-Gordon equation<sup>1,2</sup>. Being  $x$  the propagation direction, the  
 57 Josephson phase evolution is described by:

58

$$59 \quad \frac{\partial^2 \theta_{i,i+1}(x,t)}{\partial x^2} - \frac{1}{\gamma} \frac{\partial \theta_{i,i+1}(x,t)}{\partial t} - \frac{\epsilon_r}{c^2} \frac{\partial^2 \theta_{i,i+1}(x,t)}{\partial t^2} = \frac{\omega_p^2 \epsilon_r}{c^2} \sin \theta_{i,i+1}(x,t) \quad (6)$$

60

61 The damping factor  $\gamma$  is a fitting parameter used to reproduce the optical properties  
 62 observed experimentally. In this section, we drop the subscripts for simplicity, *i.e.*  
 63 we redefine  $\theta_{i,i+1}(x,t) = \theta(x,t)$ . The pump and probe THz fields impinge on the  
 64 superconductor at the boundary  $x = 0$ . The Josephson phase evolution is therefore  
 65 affected by the following boundary conditions at the vacuum-sample interface<sup>3</sup>.

66

$$67 \quad [E_i(t) + E_r(t)]_{x=-0} = E_c(x,t)|_{x=+0} = H_0 \frac{1}{\omega_{\text{JPR}} \sqrt{\epsilon}} \frac{\partial \theta(x,t)}{\partial t} \Big|_{x=+0}, \quad (7)$$

$$68 \quad [H_i(t) + H_r(t)]_{x=-0} = H_c(x,t)|_{x=+0} = -H_0 \lambda_J \frac{\partial \theta(x,t)}{\partial x} \Big|_{x=+0}. \quad (8)$$

69

70 The subscripts  $i$ ,  $r$ , and  $c$  denote the fields incident, reflected and propagating inside  
 71 the cuprate, respectively. Here  $H_0 = \Phi_0 / 2\pi D \lambda_J$ , where  $\Phi_0$  is the flux quantum  
 72 ( $\Phi_0 = \frac{hc}{2e}$ ) and  $D$  is the distance between adjacent superconducting layers. The  
 73 equilibrium Josephson Plasma Resonance (JPR) is an input parameter in the  
 74 simulations, which is chosen to be that of  $\text{La}_{1.905}\text{Ba}_{0.095}\text{CuO}_4$ , *i.e.*  $\omega_{\text{JPR}} = 0.5$  THz.

75 For fields in vacuum ( $x < 0$ ), the Maxwell's equations imply

76

$$77 \quad E_i - E_r = \frac{\omega \mu}{ck} (H_i + H_r) = H_i + H_r. \quad (9)$$

78

79 By combining Eq. (9) with Eq. (7) and (8) we obtain the boundary condition

80

$$81 \quad \frac{2\sqrt{\epsilon}}{H_0} E_i(t)|_{x=-0} = \frac{\partial \theta(x,t)}{\omega_{\text{JPR}} \partial t} \Big|_{x=+0} - \sqrt{\epsilon} \frac{\partial \theta(x,t)}{\partial x / \lambda_J} \Big|_{x=+0}. \quad (10)$$

82

83 After solving the Josephson phase through Eq. (6) and Eq. (10), the reflected field is  
 84 calculated from Eq. (7). The equilibrium reflectivity of the cuprate is obtained by  
 85 computing the ratio between the Fourier transforms of the reflected field and a  
 86 weak input field

87

$$88 \quad r^{\text{equilibrium}}(\omega) = E_r^{\text{equilibrium}}(\omega)/E_i(\omega). \quad (11)$$

89

90 The complex optical properties are then calculated from  $r^{\text{equilibrium}}(\omega)$ . In  
 91 particular, the equilibrium dielectric permittivity and loss function are computed as:

92

$$\varepsilon(\omega) = \left( \frac{1 - r^{\text{equilibrium}}(\omega)}{1 + r^{\text{equilibrium}}(\omega)} \right)^2$$

$$L(\omega) = -\text{Imag} \left( \frac{r^{\text{equilibrium}}(\omega) + 1}{r^{\text{equilibrium}}(\omega) - 1} \right)^2$$

93

94 For the pump-probe configuration, the input field is the sum of the pump and probe  
 95 fields (with a defined delay between them):

96

$$97 \quad E_i(t) = E_{\text{pump}}(t) + E_{\text{probe}}(t). \quad (12)$$

98

99 Correspondingly, the Josephson phase can be written as

100

$$101 \quad \theta = \theta_{\text{pump}} + \theta_{\text{probe}}. \quad (13)$$

102

103 And the sine-Gordon equation (6) decomposes into two coupled equations

104

$$105 \quad \frac{\partial^2 \theta_{\text{pump}}(x,t)}{\partial x^2} - \frac{1}{\gamma} \frac{\partial \theta_{\text{pump}}(x,t)}{\partial t} - \frac{\varepsilon_r}{c^2} \frac{\partial^2 \theta_{\text{pump}}(x,t)}{\partial t^2} = \frac{\omega_p^2 \varepsilon_r^2}{c^2} \sin \theta_{\text{pump}}(x,t) \cos \theta_{\text{probe}}(x,t) \quad (14)$$

$$106 \quad \frac{\partial^2 \theta_{\text{probe}}(x,t)}{\partial x^2} - \frac{1}{\gamma} \frac{\partial \theta_{\text{probe}}(x,t)}{\partial t} - \frac{\varepsilon_r}{c^2} \frac{\partial^2 \theta_{\text{probe}}(x,t)}{\partial t^2} = \frac{\omega_p^2 \varepsilon_r^2}{c^2} \sin \theta_{\text{probe}}(x,t) \cos \theta_{\text{pump}}(x,t) \quad (15)$$

107

108 For a weak probe ( $\theta \ll 1$ ),  $\cos \theta_{\text{probe}} \approx 1$  and the effect of  $\theta_{\text{probe}}$  on  $\theta_{\text{pump}}$  can be  
109 neglected in Eq. (14). The phases  $\theta_{\text{pump}}$  and  $\theta_{\text{probe}}$  are calculated in two steps: (i)  
110 Eqs. (14) and (10) are solved with the driving field  $E_i = E_{\text{pump}}$  to get  $\theta_{\text{pump}}(x, t)$  and  
111 then (ii) Eq. (15) and (10) are solved by substituting  $\theta_{\text{pump}}(x, t)$  with the input field  
112  $E_i = E_{\text{probe}}$ , to obtain  $\theta_{\text{probe}}(x, t)$  and the reflected probe field  $E_r^{\text{perturb}}$ . The  
113 perturbed reflectivity is given by

114

$$115 \quad r^{\text{perturb}}(\omega, t) = E_r^{\text{perturb}}(\omega, t)/E_i(\omega). \quad (16)$$

116

117 The optical response functions of the perturbed material are extracted from the  
118 complex optical reflectivity  $r^{\text{perturb}}$ . For instance, the dielectric permittivity and loss  
119 function are calculated as:

120

$$\varepsilon(\omega) = \left( \frac{(1 - r^{\text{perturb}}(\omega))^2}{1 + r^{\text{perturb}}(\omega)} \right)$$

121

$$L(\omega, t) = -\text{Imag} \left( \frac{(r^{\text{perturb}}(\omega, t) + 1)^2}{r^{\text{perturb}}(\omega, t) - 1} \right).$$

122

#### 123 **S4. Pump spectrum**

124 The electric field profile of the THz pump pulse measured at the sample position is  
125 displayed in Fig. S2A along with the corresponding frequency spectrum (Fig. S2B).  
126 This is peaked at  $\sim 0.5$  THz, being therefore resonant with the JPR of LBCO<sub>9.5</sub> (see  
127 reflectivity edge in the blue curve of Fig. S2B). The input pump field used in the  
128 simulations is also displayed (dashed), both in time (Fig. S2A) and frequency  
129 domain (Fig. S2B).

130

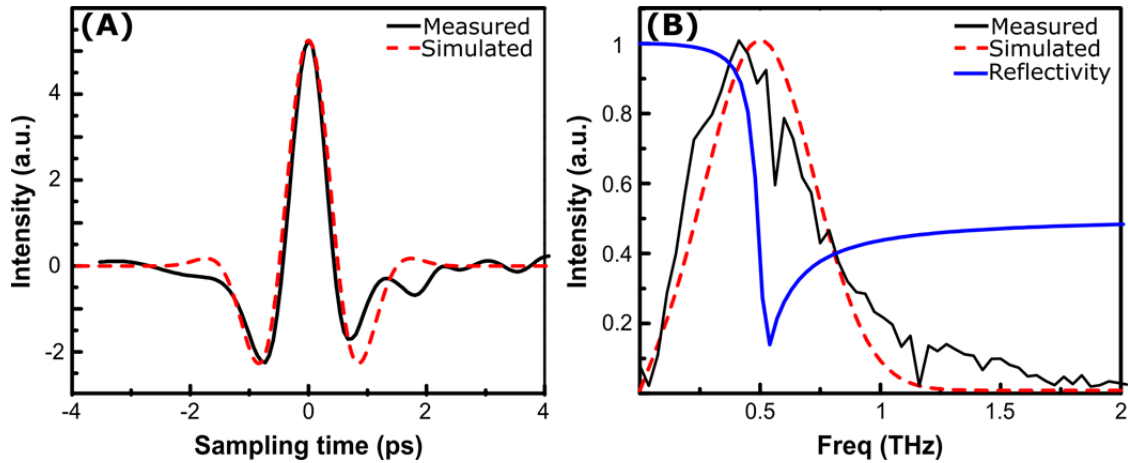

131

132 **Figure S2.** (A) Electro-optic sampling trace of the THz pump pulse measured at the sample position and  
 133 (B) corresponding frequency spectrum. The *c*-axis equilibrium reflectivity of LBCO<sub>9,5</sub> at T = 5 K is also  
 134 displayed. Dashed lines in both panels refer to the input pump field used in simulations. The ringing  
 135 observed on the trailing edge of the pulse (black line in A) is due to narrow water absorption lines at ~0.5  
 136 THz and ~1.2 THz (see also corresponding spectrum in B). These can be ignored because all measurements  
 137 but that reported in this figure have been performed under high vacuum condition ( $P = 10^{-6}$  mbar).  
 138

139

140

141

### **S5. Pump field dependence**

142 The spectrally integrated pump-probe response is displayed in Fig. S3 for different  
 143 pump field strengths. A minimum field of ~30 kV/cm was required to induce a  
 144 response of sufficient amplitude to be detected in our experiment.

145 The oscillatory behavior at twice the equilibrium JPR frequency was found to be  
 146 only weakly dependent on the pump field strength. Note that pump-field-  
 147 independent  $2\omega_{\text{JPR}}$  oscillations are only observed at  $t \gtrsim 0$  ps, *i.e.* after the early-time  
 148 dynamics ( $t \lesssim 0$  ps) dominated by perturbed free induction decay<sup>4,5,6</sup> (shaded region  
 149 in Fig. S3).

150 The time-delay and frequency dependent loss function measured with a pump field  
 151 of 40 kV/cm is displayed in Fig. S4, along with the corresponding theoretical  
 152 calculations. These can be compared with the data of Fig. 5 in the main text, which  
 153 were taken with a higher pump field (~80 kV/cm). Remarkably, while the  $2\omega_{\text{JPR}}$   
 154 oscillatory behavior is observed in both data sets, periodic amplification is only  
 155 present with stronger pump field (consistently in both experiment and calculations).

156 This indicates that phase-sensitive amplification of Josephson Plasma Wave can be  
 157 achieved only for THz pump field amplitudes above a threshold of  $\sim 70$  kV/cm.

158

159

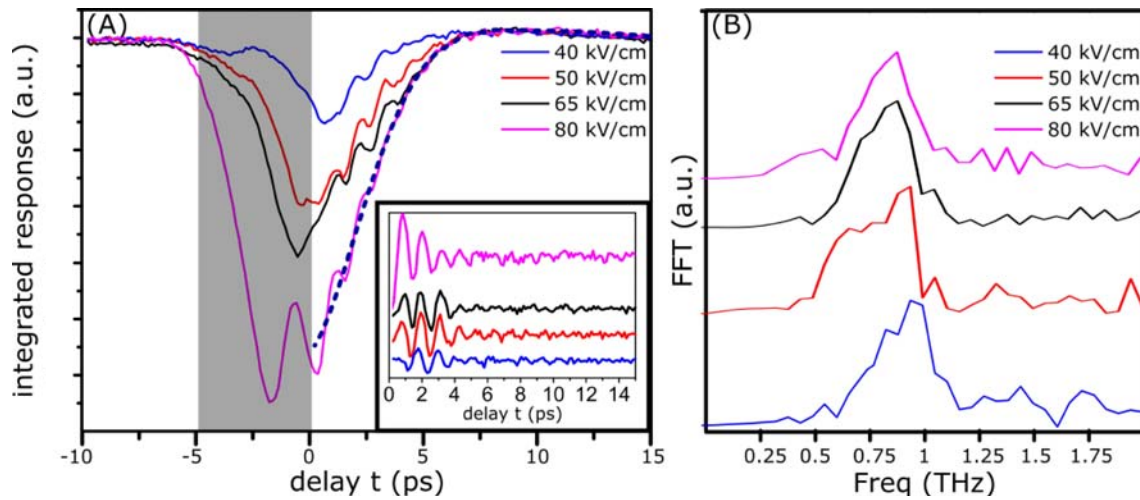

160

161 **Figure S3.** (A) Spectrally-integrated pump-probe response measured for different pump field strengths at a  
 162 sample temperature  $T = 5$  K. The dashed line is an example of background which was subtracted to extract  
 163 the oscillatory components shown in the inset. The negative time delay region, interested by perturbed free  
 164 induction decay, is shaded in grey. (B) Normalized Fourier transforms of the oscillatory signals.

165

166

167

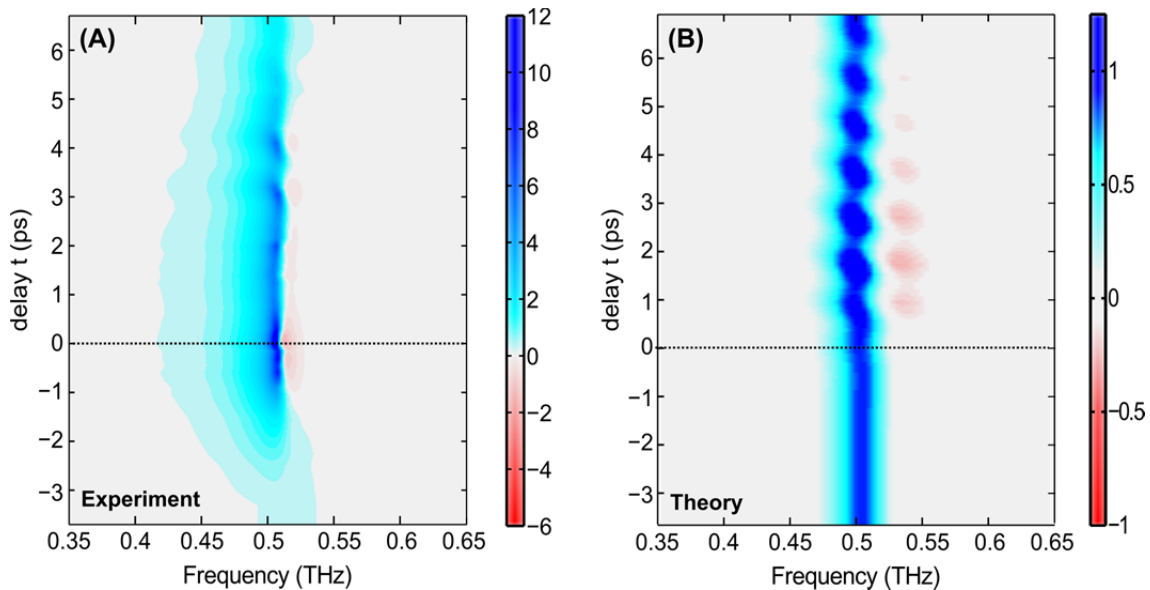

168

169 **Figure S4.** Time-delay and frequency dependent loss function determined (A) experimentally and (B) by  
 170 numerically solving the sine-Gordon equation in nonlinear regime. The applied THz pump field is  
 171 40 kV/cm.

172



173 **S6. Temperature dependence**

174 In Fig. S5 we show the measured equilibrium reflectivity of LBCO<sub>9.5</sub> at two different  
 175 temperatures. The JPR exhibits a red shift from  $\sim 0.5$  THz to  $\sim 0.35$  THz upon  
 176 increasing the sample temperature from 5 K to 30 K.

177 The temperature dependence of the spectrally integrated pump-probe response has  
 178 also been determined experimentally (only the oscillatory component of this  
 179 response is shown in Fig. S5B). As expected, the measured oscillations slow down  
 180 with increasing  $T$ . Indeed their frequency reduces from  $\sim 1$  THz at 5 K to  $\sim 0.75$  THz  
 181 at 30 K, scaling as  $2\omega_{\text{JPR}}$ .

182

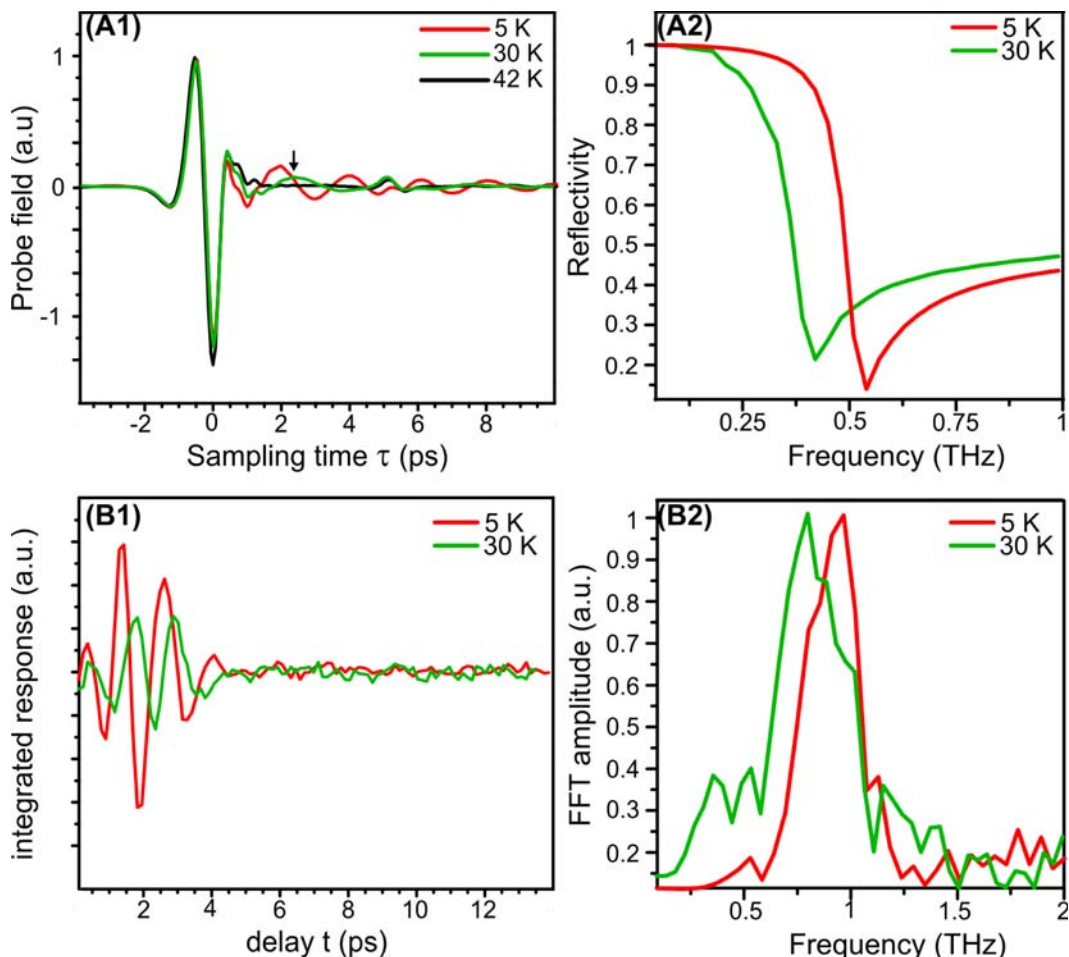

183

184 **Figure S5.** (A1)  $E_{\text{probe}}(\tau)$  measured in absence of pump field at different temperatures above and below  $T_c$ .  
 185 (A2) Frequency-dependent reflectivity at  $T = 5$  K and  $T = 30$  K, extracted from the  $E_{\text{probe}}(\tau)$  trace of panel  
 186 (A1). (B1) Oscillatory component of the spectrally-integrated pump-probe response, measured at  $T = 5$  K  
 187 and  $T = 30$  K at the same  $\tau$  (arrow in (A1)). (B2) Corresponding Fourier transforms of the oscillatory  
 188 integrated response.

189

190 **S7. Parametric Amplification**

191 An increase of the signal amplitude along the sampling time axis  $\tau$ , which is in fact the  
 192 Fourier transform of the spectrum, is shown in Fig. 4 of the main text. Amplification is  
 193 demonstrated even more directly in Fig. 5, where we show the energy loss function. As  
 194 discussed in the text, this function is proportional to  $\varepsilon_2(\omega)$ , and it is shown to become  
 195 negative at selected time delays.

196

197

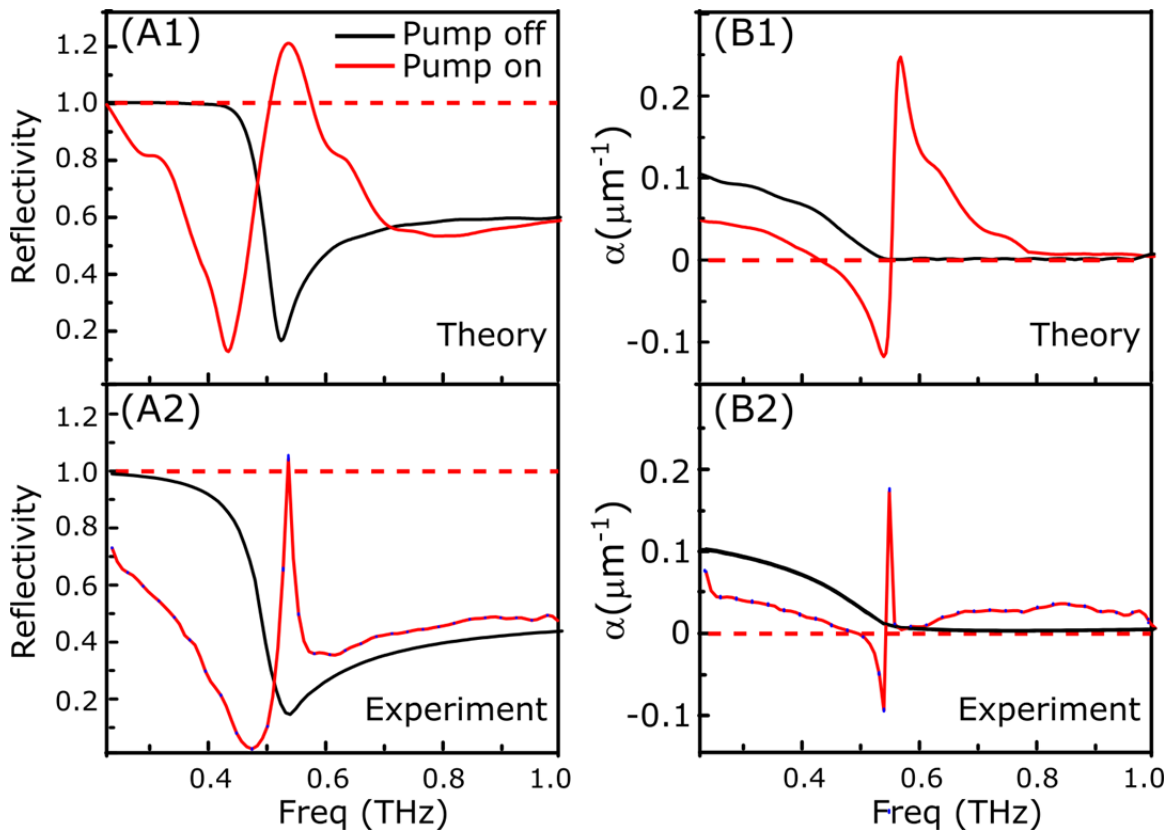

198

199 **Figure S6.** (A) Frequency-dependent reflectivity and (B) corresponding absorption coefficient, determined  
 200 before and after excitation (at a selected pump-probe delay  $t$ ). Experimental data (A2, B2) are displayed  
 201 along with simulations (A1, B1), consistently showing amplification at  $\omega \sim \omega_{JP0}$ . Dashed lines at  $R = 1$  and  
 202  $\alpha = 0$  are visualized to emphasize the amplification. Error bars (blue ticks in A2, B2) are propagated from  
 203 the standard deviation in the measured  $\Delta E_R/E_R$  signal (estimated from different scans).

204

205

206 In order to quantify the level of amplification, we use the absorption coefficient  $\alpha$ , as in

207 Ref. 7. The lowest value determined at  $\omega_{JP0}$  is  $\alpha = \frac{2\omega}{c} \text{Im}(\tilde{n}) \simeq (-0.090 \pm 0.003) \mu\text{m}^{-1}$

208 (here  $\tilde{n}$  is the complex refractive index), as shown in the Fig. S6B for both experiment  
209 and simulations.

210 For clarity, we also include the reflectivity in Fig. S6A, which for a specific frequency  
211 becomes larger than 1 ( $R = 1.042 \pm 0.008$ ), providing a further demonstration of  
212 amplification.

213  
214  
215

### **References**

- 216 1. Hu, X. & Lin, S.-Z. Phase dynamics in a stack of inductively coupled intrinsic Josephson junctions  
217 and terahertz electromagnetic radiation. *Supercond. Sci. Technol.* **23**, 053001 (2010).  
218 2. Dienst, A. *et al.* Optical excitation of Josephson plasma solitons in a cuprate superconductor. *Nat.*  
219 *Mater.* **12**, 535–541 (2013).  
220 3. Savel'ev, S., Yampol'skii, V. A., Rakhmanov, A. L. & Nori, F. Terahertz Josephson plasma waves in  
221 layered superconductors: spectrum, generation, nonlinear and quantum phenomena. *Rep. Prog. Phys.*  
222 **73**, 026501 (2010).  
223 4. Kindt, J. T. & Schmuttermaer, C. A. Theory for determination of the low-frequency time-dependent  
224 response function in liquids using time-resolved terahertz pulse spectroscopy. *J. Chem. Phys.* **110**,  
225 8589–8596 (1999).  
226 5. Beard, M. C., Turner, G. M. & Schmuttermaer, C. A. Transient photoconductivity in GaAs as  
227 measured by time-resolved terahertz spectroscopy. *Phys. Rev. B* **62**, 15764–15777 (2000).  
228 6. Hamm, P. Coherent effects in femtosecond infrared spectroscopy. *Chem. Phys.* **200**, 415–429 (1995).  
229 7. Huber R. *et al.*, Stimulated Terahertz Emission from Intraexcitonic Transitions in Cu<sub>2</sub>O. *Phys. Rev.*  
230 *Lett.* **96**, 017402 (2006).  
231
